# Supplementary material
Source: MDPI journal article supplement (https://www.mdpi.com/2073-4441/13/18/2565)
Supplement: s1 [file s1]

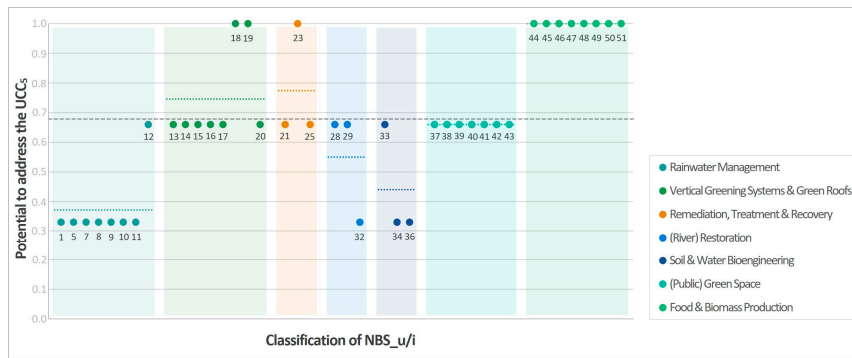

**Figure S1.** Potential of selected representatives urban agriculture-related NBS units and interventions (NBS\_u/i) to address the fifth urban circularity challenge (UCC5) on “Food and biomass production”, according to the score range (0.33, 0.66, 1.00) (cf. Tables 1 and 2). Numbers refer to those of NBS\_u/i from Table 2. Color legend refers to the categories of NBS\_u/i (cf. Table 2).

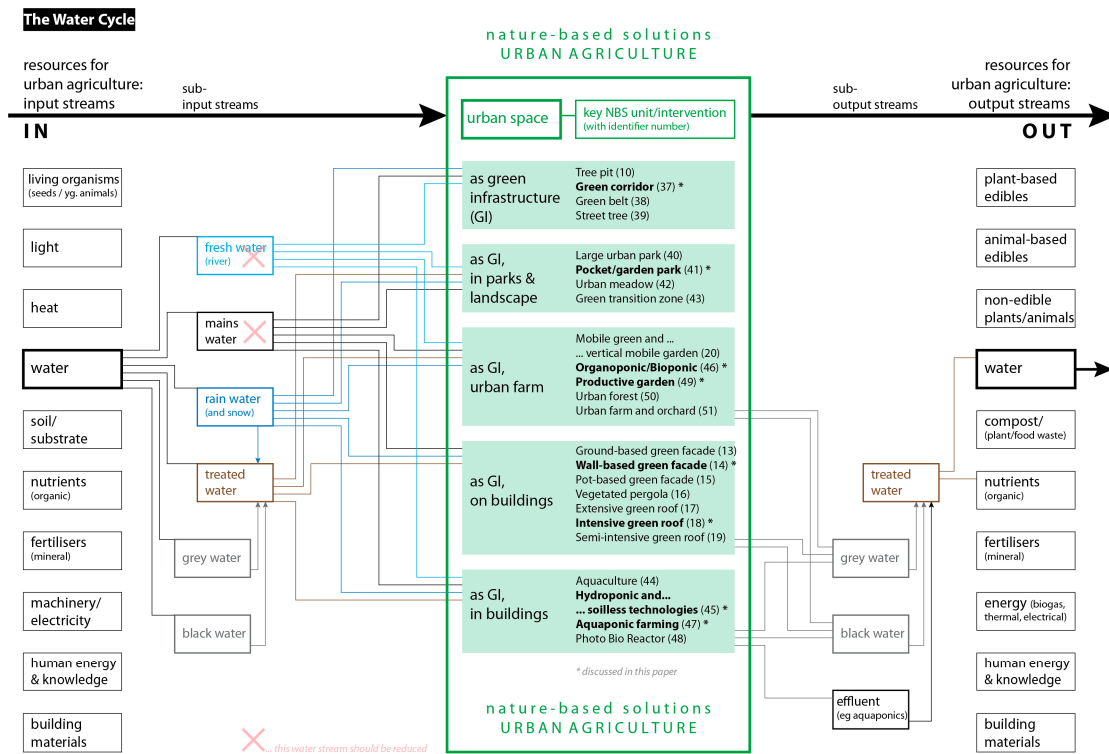

**Figure S2.** Overview of input and output streams in urban agriculture with focus on water.
